# Supplementary material for: Suitability study of Ag nanosheet SERS substrates as a screening method for imidacloprid after QuEChERS extraction
Source: Royal Society of Chemistry journal article supplement (doi:10.1039/d3nj05956a), 2024-01-01
Supplement: d3nj05956a1.pdf [file d3nj05956a1.pdf]

## Supporting Information

### Suitability study of Ag nanosheet SERS substrate as a screening method for imidacloprid after QuEChERS extraction

Felipe Leyton-Soto<sup>a</sup>, Zachary D. Schultz<sup>d</sup>, Rodrigo Ormazábal-Toledo<sup>e</sup>, Domingo Ruiz-León<sup>f</sup>, Ady Giordano<sup>a\*</sup>, Mauricio Isaacs<sup>a,b,c\*</sup>

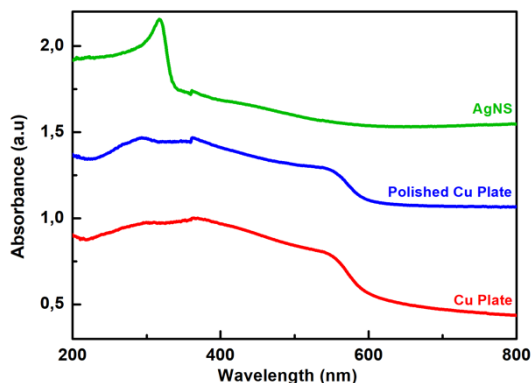

**Figure S1** UV-Vis absorption spectra of the samples: Cu plate, polished Cu plate and the optimal AgNS substrate.

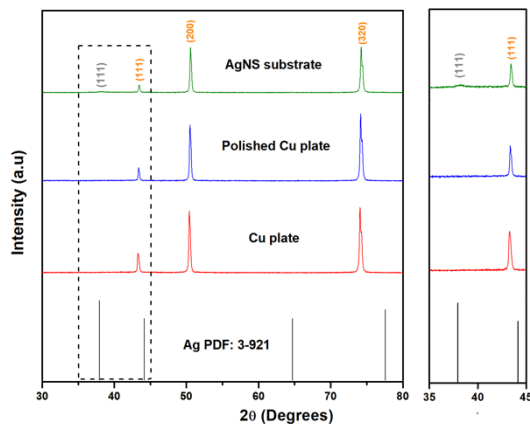

**Figure S2.** XRD pattern of the samples: Cu plate, polished Cu plate and the optimal Ag NS substrate.

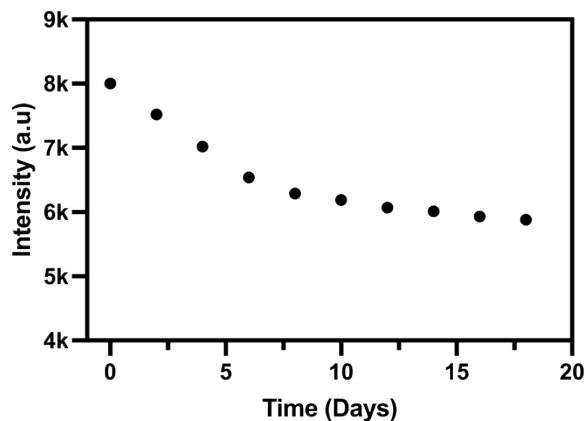

**Figure S3.** Relationship between the SERS intensity at the peak of  $1610\text{ cm}^{-1}$  of methylene blue and the storage time.

| Modes | Raman Shift ( $\text{cm}^{-1}$ ) |              |      | Assignments                                                                                                         |
|-------|----------------------------------|--------------|------|---------------------------------------------------------------------------------------------------------------------|
|       | DFT                              | Experimental | SERS |                                                                                                                     |
| 01    | 319                              | 320          |      | $\delta(\text{ring1})_{\text{out plane}}, \delta(\text{ring2})$                                                     |
| 02    | 409                              | 418          | 370  | $\delta(\text{ring1})_{\text{out plane}}, \delta(\text{ring2}), \nu(\text{C-Cl})$                                   |
| 03    | 445                              | 471          | 442  | $\delta(\text{ring1})_{\text{out plane}}, \delta(\text{ring2})$                                                     |
| 04    | 481                              | 494          | 506  | $\delta(\text{ring1})_{\text{out plane}}, \delta(\text{ring2}), \nu(\text{C-Cl})$                                   |
| 05    | 643                              | 631          | 616  | $\delta(\text{ring1})_{\text{in plane}}, \delta(\text{CN})$                                                         |
| 06    | 670                              | 658          | 665  | $\delta(\text{ring1})_{\text{in plane}}, \delta(\text{CCN}), \nu(\text{C-Cl}),$                                     |
| 07    | 697                              | 690          | 694  | $\delta(\text{ring1})_{\text{in plane}}, \delta(\text{NCNN}), \delta(\text{CN}), \nu(\text{C-Cl})$                  |
| 08    | 778/751                          | 750          | 759  | $\delta(\text{ring1})_{\text{out plane}}, \rho(\text{CH}_2), \omega(\text{NO}_2)$                                   |
| 09    | 814                              | 815          | 820  | $\delta(\text{CH})_{\text{out plane}}, \rho(\text{CH}_2)$                                                           |
| 10    | 841                              | 831          |      | $\delta(\text{CH})_{\text{out plane}}, \rho(\text{CH}_2)$                                                           |
| 11    | 886                              | 886          |      | $\delta(\text{ring2}), \rho(\text{CH}_2)$                                                                           |
| 12    | 958                              | 958          | 932  | $\delta(\text{CN})_{\text{in plane}}, \delta(\text{CH})_{\text{out plane}}, \omega(\text{CH}_2), \tau(\text{CH}_2)$ |
| 13    | 985                              | 995          | 994  | $\nu(\text{ring1}), \omega(\text{CH}_2)$                                                                            |
| 14    | 1057                             | 1050         | 1046 | $\nu(\text{NN}), \nu(\text{CN})$                                                                                    |
| 15    | 1102                             | 1096         |      | $\nu(\text{ring2}), \tau(\text{CH}_2)$                                                                              |
| 16    | 1129                             | 1107         |      | $\nu(\text{ring1}), \nu(\text{C-Cl})$                                                                               |
| 17    | 1165                             | 1139         | 1161 | $\delta(\text{CH})_{\text{in plane}}$                                                                               |
| 18    | 1201                             | 1200         |      | $\tau(\text{CH}_2)$                                                                                                 |
| 19    | 1237                             | 1243         | 1238 | $\nu(\text{ring2}), \delta(\text{CH})_{\text{in plane}}, \tau(\text{CH}_2)$                                         |
| 20    | 1309                             | 1276         | 1283 | $\nu(\text{ring1}), \omega(\text{CH}_2), \tau(\text{CH}_2)$                                                         |
| 21    | 1327                             | 1298         | 1321 | $\nu_s(\text{NO}_2), \omega(\text{CH}_2), \tau(\text{CH}_2)$                                                        |
| 22    | 1390                             | 1370         | 1363 | $\nu_s(\text{NO}_2), \delta(\text{CH})_{\text{in plane}}, \omega(\text{CH}_2)$                                      |
| 23    | 1471                             | 1449         | 1422 | $\nu(\text{CN}), \omega(\text{CH}_2), \tau(\text{CH}_2)$                                                            |
| 24    | 1498                             | 1481         | 1494 | $\nu(\text{ring1}), \delta(\text{CH}_2)$                                                                            |
| 25    | 1642/1615                        | 1567         | 1560 | $\nu(\text{ring1})$                                                                                                 |
| 26    | 1705/1687                        | 1582         | 1600 | $\nu_{\text{as}}(\text{NO}_2), \nu_{\text{as}}(\text{NCN}), \delta(\text{NH})$                                      |

**Table S1.** Experimental, calculated and SERS vibrational frequencies for imidacloprid.

Abbreviations:  $\nu$ , stretching;  $\delta$ , bending;  $\omega$ , wagging;  $\tau$ , twisting;  $\rho$ , rocking; s, symmetric mode; as, antisymmetric mod
